# Supplementary material
Source: MDPI journal article supplement (https://www.mdpi.com/2072-4292/12/9/1362)
Supplement: s1 [file s1]

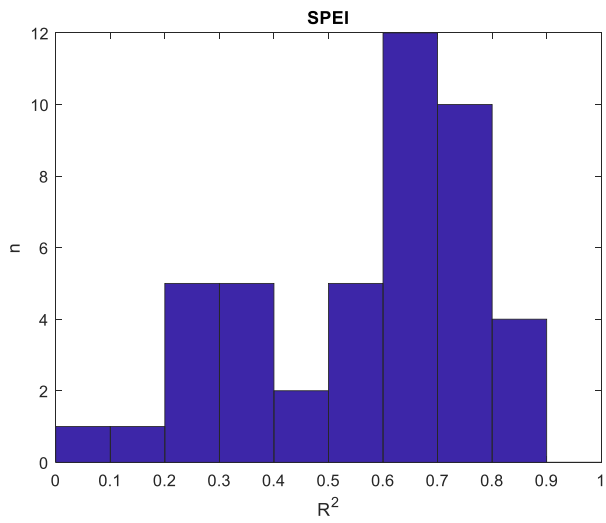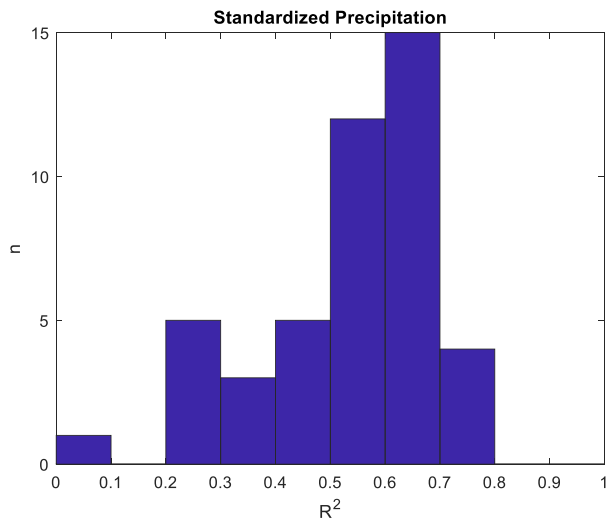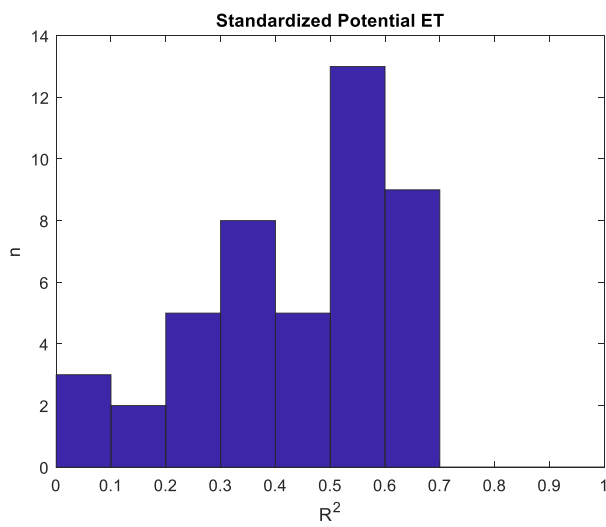

**Figure S1.** Comparison of coefficients of determination ( $R^2$ ) histograms for NDVI relations to Standardized Precipitation-Evapotranspiration Index (SPEI), Standardized Precipitation, and Standardized Potential Evapotranspiration by EPA Level 4 Ecoregion.

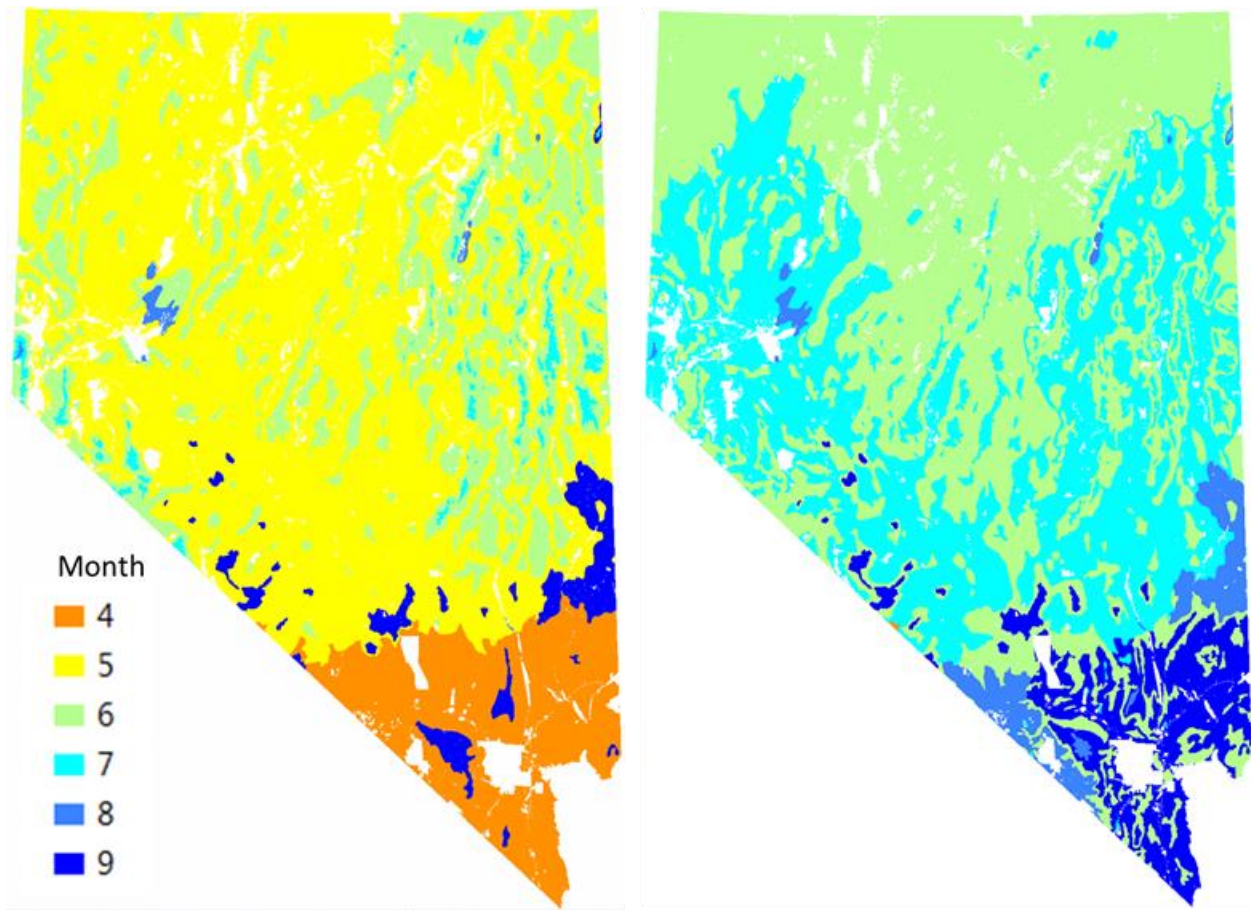

**Figure S2.** Month of peak NDVI in upland (left) and riparian (right) vegetation by EPA Level 4 Ecoregion.
